# Supplementary material for: Neuroanatomical and Functional Correlates of Cognitive and Affective Empathy in Young Healthy Adults
Source: Front Behav Neurosci. 2019 May 1;13:85. doi: 10.3389/fnbeh.2019.00085 (PMC6504763; doi:10.3389/fnbeh.2019.00085)
Supplement: Supplementary file 1 [file Data_Sheet_1.docx]

Supplementary Material

**Neuroanatomical and functional correlates of cognitive and affective empathy in young healthy adults**

Carme Uribe1 #, Arnau Puig-Davi1 #, Alexandra Abos1, Hugo C Baggio1, Carme Junqué 1,2,3 * and Barbara Segura1,2.

1Medical Psychology Unit, Department of Medicine. Institute of Neuroscience, University of Barcelona. Barcelona, Catalonia.

2Centro de Investigación Biomédica en Red sobre Enfermedades Neurodegenerativas (CIBERNED), Hospital Clínic de Barcelona. Barcelona, Spain.

3Institute of Biomedical Research August Pi i Sunyer (IDIBAPS). Barcelona, Catalonia.

**# CU and APD contributed equally to the manuscript.**

*** Correspondence:**Prof. Carme Junque

Medical Psychology Unit, Department of Medicine. University of Barcelona

Casanova 143 (08036) Barcelona, Spain

Phone: (+34) 93 402 45 70 // Fax: (+34) 93 403 52 94 // E-mail: [cjunque@ub.edu](mailto:cjunque@ub.edu)

# Supplementary Tables

## Supplementary Table 1 Regions of the Brainnetome atlas selected for the masks

| ***MNI coordinates***  ***x y z*** |
| --- |
| -7 54 -7 left orbital 6_1 |
| 6 47 -7 right orbital 6_1 |
| -37 33 -16 left orbital 6_2 |
| 40 39 -14 right orbital 6_2 |
| -23 38 -18 left orbital 6_3 |
| 24 36 -18 right orbital 6_3 |
| -6 52 -20 left orbital 6_4 |
| 6 57 -16 right orbital 6_4 |
| -10 18 -19 left orbital 6_5 |
| 9 20 -19 right orbital 6_5 |
| -41 32 -9 left orbital 6_6 |
| 42 31 -9 right orbital 6_6 |
| -36 -20 10 left insula 6_1 |
| 37 -18 8 right insula 6_1 |
| -32 14 -13 left insula 6_2 |
| 33 14 -13 right insula 6_2 |
| -34 18 1 left insula 6_3 |
| 37 19 1 right insula 6_3 |
| -38 -4 -9 left insula 6_4 |
| 39 -2 -9 right insula 6_4 |
| -39 -8 8 left insula 6_5 |
| 39 -7 8 right insula 6_5 |
| -38 5 4 left insula 6_6 |
| 38 5 5 right insula 6_6 |
| -4 -39 31 cingulate gyrus left 7_1 |
| 5 -37 32 cingulate gyrus right 7_1 |
| -3 8 26 cingulate gyrus left 7_2 |
| 5 21 13 cingulate gyrus right 7_2 |
| -6 34 21 cingulate gyrus left 7_3 |
| 5 28 27 cingulate gyrus right 7_3 |
| -8 -47 9 cingulate gyrus left 7_4 |
| 8 -44 11 cingulate gyrus right 7_4 |
| -5 7 37 cingulate gyrus left 7_5 |
| 4 6 38 cingulate gyrus right 7_5 |
| -8 -23 41 cingulate gyrus left 7_6 |
| 6 -20 41 cingulate gyrus right 7_6 |
| -4 39 -2 cingulate gyrus left 7_7 |
| 5 41 7 cingulate gyrus right 7_7 |
| -19 -2 -20 left amygdala 2_1 |
| 19 -3 -20 right amygdala 2_1 |
| -27 -4 -20 left amygdala 2_2 |
| 28 -3 -20 right amygdala 2_2 |
| -22 -14 -19 left hippocampus 2_1 |
| 22 -12 -20 right hippocampus 2_1 |
| -28 -30 -10 left hippocampus 2_2 |
| 29 -27 -10 right hippocampus 2_2 |
| -7 -12 5 left thalamus 8_1 |
| 7 -11 6 right thalamus 8_1 |
| -19 -13 3 left thalamus 8_2 |
| 13 -14 1 right thalamus 8_2 |
| -18 -23 3 left thalamus 8_3 |
| 18 -22 3 right thalamus 8_3 |
| -6 -13 7 left thalamus 8_4 |
| 2 -12 5 right thalamus 8_4 |
| -16 -24 6 left thalamus 8_5 |
| 15 -26 6 right thalamus 8_5 |
| -15 -29 4 left thalamus 8_6 |
| 13 -27 8 right thalamus 8_6 |
| -11 -21 13 left thalamus 8_7 |
| 9 -14 14 right thalamus 8_7 |
| -11 -14 2 left thalamus 8_8 |
| 13 -16 6 right thalamus 8_8 |

## Supplementary Table 2 Motion parameters

|  | **males (n=19)** | **females (n=22)** | **total**  **(n=41)** | **U test (Mann-Whitney)** | **p-value** |
| --- | --- | --- | --- | --- | --- |
| **mean FD, median (IQR)** | 0.12 (0.05) | 0.09 (0.09) | 0.10 (0.08) | 153.0 | 0.143 |
| **maximum FD, median (IQR)** | 0.45 (0.31) | 0.37 (0.29) | 0.39 (0.31) | 159.0 | 0.191 |
| **mean rotation mean, median (IQR)** | 0.03 (0.02) | 0.02 (0.01) | 0.03 (0.01) | 160.0 | 0.200 |
| **maximum rotation, median (IQR)** | 0.17 (0.13) | 0.12 (0.15) | 0.14 (0.14) | 155.0 | 0.158 |
| **mean translation mean, median (IQR)** | 0.06 (0.04) | 0.04 (0.05) | 0.05 (0.04) | 160.0 | 0.200 |
| **maximum translation, median (IQR)** | 0.22 (0.12) | 0.18 (0.17) | 0.21 (0.13) | 161.0 | 0.210 |
| **correlation FD - DVARS, median (IQR)** | 0.05 (0.20) | -0.08 (0.17) | -0.04 (0.21) | 140.0 | 0.071 |

Abbreviations: DVARS, temporal derivative of timecourses of root mean square variance over voxels; FD, framewise displacement; IQR, interquartile range.

## Supplementary Table 3 Limbic subcortical volumes

|  | **high empathy** | **low empathy** | **Univariate F-test** | **p-value** |
| --- | --- | --- | --- | --- |
| ***Perspective Taking* (high = 28; low = 14); t2 =0.461; P = 0.921** | | | | |
| **Left Amygdala** | 0.12 (0.01) | 0.12 (0.01) | 0.144 | 0.707 |
| **Right Amygdala** | 0.12 (0.01) | 0.12 (0.01) | 0.158 | 0.693 |
| **Left Hippocampus** | 0.23 (0.01) | 0.23 (0.01) | 0.198 | 0.658 |
| **Right Hippocampus** | 0.23 (0.01) | 0.23 (0.02) | 0.021 | 0.884 |
| **Left Accumbens** | 0.03 (0.01) | 0.03 (0.00) | 0.214 | 0.646 |
| **Right Accumbens** | 0.04 (0.01) | 0.04 (0.00) | 0.212 | 0.648 |
| **Left Thalamus** | 0.42 (0.03) | 0.41 (0.04) | 0.078 | 0.781 |
| **Right Thalamus** | 0.43 (0.24) | 0.43 (0.04) | 0.019 | 0.890 |
| **Left Putamen** | 0.32 (0.04) | 0.33 (0.03) | 0.396 | 0.533 |
| **Right Putamen** | 0.33 (0.04) | 0.33 (0.03) | 0.000 | 0.998 |
| **Left Caudate** | 0.24 (0.02) | 0.24 (0.02) | 0.469 | 0.497 |
| **Right Caudate** | 0.24 (0.02) | 0.25 (0.02) | 0.883 | 0.353 |
| ***Emotional Understanding* (high = 26; low = 16); t2 = 1.107; P = 0.391** | | | | |
| **Left Amygdala** | 0.12 (0.01) | 0.12 (0.01) | 0.146 | 0.704 |
| **Right Amygdala** | 0.12 (0.01) | 0.12 (0.01) | 0.017 | 0.897 |
| **Left Hippocampus** | 0.23 (0.01) | 0.23 (0.01) | 0.075 | 0.785 |
| **Right Hippocampus** | 0.23 (0.01) | 0.23 (0.02) | 0.005 | 0.942 |
| **Left Accumbens** | 0.03 (0.01) | 0.03 (0.00) | 1.978 | 0.167 |
| **Right Accumbens** | 0.04 (0.01) | 0.04 (0.00) | 0.076 | 0.784 |
| **Left Thalamus** | 0.42 (0.29) | 0.41 (0.03) | 0.164 | 0.688 |
| **Right Thalamus** | 0.43 (0.26) | 0.43 (0.03) | 0.151 | 0.700 |
| **Left Putamen** | 0.32 (0.04) | 0.32 (0.03) | 0.120 | 0.731 |
| **Right Putamen** | 0.33 (0.03) | 0.32 (0.03) | 1.257 | 0.269 |
| **Left Caudate** | 00.24 (0.03) | 0.24 (0.02) | 0.033 | 0.857 |
| **Right Caudate** | 0.24 (0.02) | 0.24 (0.02) | 0.006 | 0.939 |
| ***Empathic Distress* (high = 13; low = 29); t2 = 0.978; P = 0.491** | | | | |
| **Left Amygdala** | 0.12 (0.01) | 0.12 (0.01) | 0.563 | 0.457 |
| **Right Amygdala** | 0.12 (0.01) | 0.12 (0.01) | 0.538 | 0.468 |
| **Left Hippocampus** | 0.23 (0.01) | 0.23 (0.01) | 0.038 | 0.847 |
| **Right Hippocampus** | 0.23 (0.02) | 0.23 (0.01) | 0.329 | 0.570 |
| **Left Accumbens** | 0.03 (0.00) | 0.03 (0.01) | 0.104 | 0.749 |
| **Right Accumbens** | 0.04 (0.00) | 0.04 (0.01) | 0.135 | 0.715 |
| **Left Thalamus** | 0.43 (0.03) | 0.41 (0.03) | 4.636 | 0.037 |
| **Right Thalamus** | 0.45 (0.03) | 0.42 (0.03) | 6.741 | 0.013 |
| **Left Putamen** | 0.32 (0.04) | 0.32 (0.03) | 0.059 | 0.810 |
| **Right Putamen** | 0.33 (0.04) | 0.33 (0.03) | 0.067 | 0.798 |
| **Left Caudate** | 0.24 (0.02) | 0.24 (0.03) | 0.157 | 0.694 |
| **Right Caudate** | 0.24 (0.02) | 0.24 (0.02) | 0.056 | 0.814 |
| ***Emphatic Happiness* (high = 22; low = 20); t2 = 0.442; P = 0.932** | | | | |
| **Left Amygdala** | 0.12 (0.01) | 0.12 (0.01) | 0.227 | 0.636 |
| **Right Amygdala** | 0.12 (0.01) | 0.12 (0.01) | 0.013 | 0.912 |
| **Left Hippocampus** | 0.23 (0.01) | 0.22 (0.02) | 1.461 | 0.234 |
| **Right Hippocampus** | 0.23 (0.01) | 0.23 (0.02) | 0.149 | 0.702 |
| **Left Accumbens** | 0.03 (0.00) | 0.03 (0.00) | 0.841 | 0.365 |
| **Right Accumbens** | 0.04 (0.01) | 0.04 (0.00) | 2.961 | 0.093 |
| **Left Thalamus** | 0.42 (0.03) | 0.41 (0.03) | 1.617 | 0.211 |
| **Right Thalamus** | 0.43 (0.03) | 0.43 (0.03) | 1.234 | 0.273 |
| **Left Putamen** | 0.32 (0.04) | 0.32 (0.03) | 0.178 | 0.675 |
| **Right Putamen** | 0.33 (0.04) | 0.33 (0.03) | 0.345 | 0.560 |
| **Left Caudate** | 0.24 (0.02) | 0.24 (0.03) | 0.001 | 0.975 |
| **Right Caudate** | 0.24 (0.02) | 0.24 (0.02) | 0.004 | 0.948 |
| ***TECA global score* (high = 26; low = 16); t2 = 0.491; P = 0.903** | | | | |
| **Left Amygdala** | 0.12 (0.01) | 0.12 (0.01) | 0.005 | 0.947 |
| **Right Amygdala** | 0.12 (0.01) | 0.12 (0.01) | 0.267 | 0.608 |
| **Left Hippocampus** | 0.23 (0.01) | 0.23 (0.01) | 0.196 | 0.661 |
| **Right Hippocampus** | 0.23 (0.01) | 0.23 (0.02) | 0.376 | 0.543 |
| **Left Accumbens** | 0.03 (0.00) | 0.03 (0.00) | 0.001 | 0.974 |
| **Right Accumbens** | 0.04 (0.01) | 0.04 (0.00) | 0.108 | 0.744 |
| **Left Thalamus** | 0.42 (0.03) | 0.41 (0.03) | 1.650 | 0.206 |
| **Right Thalamus** | 0.43 (0.03) | 0.42 (0.03) | 1.916 | 0.174 |
| **Left Putamen** | 0.32 (0.04) | 0.33 (0.03) | 0.582 | 0.450 |
| **Right Putamen** | 0.33 (0.04) | 0.33 (0.02) | 0.353 | 0.555 |
| **Left Caudate** | 0.24 (0.03) | 0.24 (0.02) | 0.399 | 0.531 |
| **Right Caudate** | 0.24 (0.02) | 0.24 (0.02) | 0.278 | 0.601 |

TECA, Test of Cognitive and Affective Empathy.

Data are ratios to estimated intracranial volume and they are shown as means (SD). Multivariate ANOVA test stat is Hotelling’s T-squared distribution statistic. Univariate statistic is F-test.
